# Supplementary material for: Chitosan grafted with a heteropolyanion-based ionic liquid as an effective and reusable catalyst for acetalization
Source: Royal Society of Chemistry journal article supplement (doi:10.1039/c6ra02169g), 2016-01-01
Supplement: c6ra02169g1.pdf [file c6ra02169g1.pdf]

## Supporting Information

### **Chitosan grafted with heteropolyanion-based ionic liquid as an effective and reusable catalyst for acetalization**

Wei-Hong Zhang,<sup>a</sup> Shan-Shan Liu,<sup>a</sup> Ping Liu,<sup>a</sup> Jie Xu,<sup>a</sup> Bing Xue,<sup>a</sup> Xian-Yong Wei<sup>b</sup>  
and Yong-Xin Li<sup>a,\*</sup>

<sup>a</sup>Jiangsu Key Laboratory of Advanced Catalytic Materials and Technology, School of  
Petrochemical Engineering, Changzhou University, Changzhou 213164, Jiangsu, PR  
China;

<sup>b</sup>Key Laboratory of Coal Processing and Efficient Utilization, Ministry of Education,  
China University of Mining & Technology, Xuzhou 221116, Jiangsu, PR China

\*E-mail: liyxluck@163.com, Tel.: +86-519-86330135

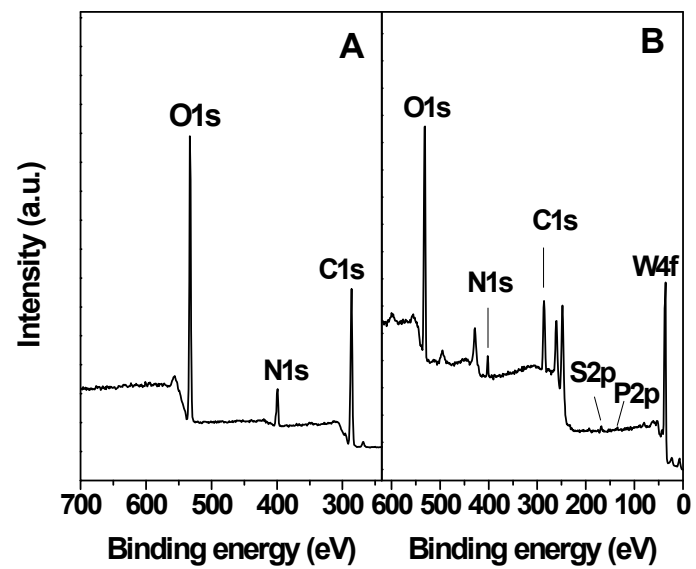

Fig. S1 XPS survey of (A) chitosan and (B) CS-VImPS-PW materials.
